# Supplementary material
Source: Elsevier journal article supplement (https://www.sciencedirect.com/science/article/pii/S0211563821000614)
Supplement: mmc1 [file S0211563821000614:mmc1.docx]

Tabla 1 online. Estrategia de búsqueda utilizada en las bases de datos

| Base de datos | Términos de búsqueda | | Filtros aplicados | Artículos encontrados | Artículos seleccionados |
| --- | --- | --- | --- | --- | --- |
| PUBMED MEDLINE | (((("Attention Deficit Disorder with Hyperactivity"[Mesh] AND ("Exercise"[Mesh] OR "Physical Fitness"[Mesh])) NOT "Pharmaceutical Preparations"[Mesh])) OR ((("Attention Deficit Disorder with Hyperactivity"[tw] OR ADDH[tw] OR ADHD[tw]) AND ("Exercise"[tw] OR "Physical Fitness"[tw] OR "Physical activity"[tw])) AND ("Motor Skills"[tw] OR "Psychomotor Performance"[tw] OR "psychomotor skills"[tw]) AND ("Impulsive Behavior"[tw] OR "impulsivity"[tw]) AND ("Social Skills"[tw] OR comunication[tw]) AND evaluation NOT ("Pharmaceutical Preparations"[tw] OR drug*[tw]))) AND random*[tw] | | Estudio controlado aleatorizado | 16 | 3 |
| BVS (LILACS/ IBECS) | (tw:("attention deficit disorder hyperactivity")) OR (tw:(ADDH)) OR (tw:(ADHD)) AND (tw:(exercise)) AND NOT (tw:(medication)) | | Ninguno | ILACS: 1  IBECS: 1 | 0 |
| COCHRANE LIBRARY | #1 ADHD  #2 MeSH descriptor: [Attention Deficit Disorder with Hyperactivity] explode all trees  #3 MeSH descriptor: [Exercise] explode all trees  #4 physical fitness  #5 exercise program  #6 physical activity  #7 MeSH descriptor: [Motor Skills] explode all trees  #8 MeSH descriptor: [Social Skills] explode all trees  #9 MeSH descriptor: [Impulsive Behavior] explode all trees  #10 MeSH descriptor: [Medicalization] explode all trees  #11 MeSH descriptor: [Pharmaceutical Preparations] explode all trees  #12 pharmacology  #13 ((#1 OR #2 ) AND (#3 OR #4 OR #5 OR #6) AND (#7 OR #8 OR #9)) NOT (#10 OR #11 OR #12) | 4581  2691  23147  8662  26265  41986  1885  188  1092  1  71447  110086  6 | Trial | 4 | 1 |
| EBSCO | MH (("Attention Deficit Disorder with Hyperactivity" AND "Exercise" NOT "Pharmaceutical Preparations") AND (((ADDH OR ADHD) AND "Physical activity" AND evaluation) NOT drug*) | | Ninguno | 4 | 0 |
| WOS (Web of science/ sciELO) | TS=("Attention Deficit Disorder with Hyperactivity" AND "Exercise" NOT drug) | | Ninguno | Web of science: 5  sciELO: 1 | 0 |
